# Supplementary material for: First chiral fluorinated lead vanadate selenite Pb2(V2O4F)(VO2)(SeO3)3with five asymmetric motifs and large optical properties
Source: Royal Society of Chemistry journal article supplement (doi:10.1039/d1dt00536g), 2021-01-01
Supplement: d1dt00536g1.pdf [file d1dt00536g1.pdf]

## Supporting Information

### **First chiral fluorinated vanadate selenite $\text{Pb}_2(\text{V}_2\text{O}_4\text{F})(\text{VO}_2)(\text{SeO}_3)_3$ with five asymmetric motifs and large optical properties**

Lin Lin,<sup>†,§</sup> Xingxing Jiang,<sup>‡,§</sup> Chao Wu,<sup>†,§</sup> Zheshuai Lin,<sup>‡</sup> Zhipeng Huang,<sup>†</sup> Mark G.  
Humphrey<sup>δ</sup> and Chi Zhang<sup>\*,†</sup>

<sup>†</sup> China-Australia Joint Research Center for Functional Molecular Materials, School of Chemical Science and Engineering, Tongji University, Shanghai 200092, China

<sup>‡</sup> Key Lab of Functional Crystals and Laser Technology, Technical Institute of Physics and Chemistry, Chinese Academy of Sciences, Beijing 100190, China

<sup>δ</sup> Research School of Chemistry, Australian National University, Canberra, ACT 2601, Australia

<sup>§</sup> L.L. X.X.J. and C.W. contributed equally to this work.

## Contents

**Table S1.** Atomic coordinates ( $\times 10^4$ ), equivalent isotropic displacement parameters ( $\text{\AA}^2 \times 10^3$ ) and bond valence sum (BVS) for PVOFS

**Table S2.** Anisotropic displacement parameters ( $\text{\AA}^2 \times 10^3$ ) for PVOFS.

**Table S3.** Selected bond lengths ( $\text{\AA}$ ) for PVOFS.

**Table S4.** The reaction parameters of contrast experiments.

**Fig. S1** Photograph of crystals of PVOFS.

**Fig. S2** Experimental and simulated powder X-ray diffraction patterns of PVOFS.

**Fig. S3** The energy dispersive spectroscopy analysis of PVOFS.

**Fig. S4** Thermogravimetric analysis of PVOFS under a nitrogen atmosphere.

**Fig. S5** UV-Vis-NIR diffuse reflectance spectrum of PVOFS.

**Fig. S6** Infrared transmittance spectrum of PVOFS.

**Table S1** Atomic coordinates ( $\times 10^4$ ), equivalent isotropic displacement parameters ( $\text{\AA}^2 \times 10^3$ ) and bond valence sum (BVS) for PVOFS.

| Atoms | Wyck. | x         | y       | z       | $U_{\text{eq}}$ | BVS  |
|-------|-------|-----------|---------|---------|-----------------|------|
| Pb(1) | 4a    | 4890(1)   | 2811(1) | 5755(1) | 14(1)           | 1.95 |
| Pb(2) | 4a    | 5030(1)   | 4702(1) | 7789(1) | 15(1)           | 1.82 |
| Se(1) | 4a    | 5140(3)   | -92(1)  | 4909(1) | 8(1)            | 3.96 |
| Se(2) | 4a    | 1380(2)   | 2260(1) | 7137(1) | 6(1)            | 3.95 |
| Se(3) | 4a    | -497(2)   | 3185(1) | 8851(1) | 6(1)            | 4.00 |
| V(1)  | 4a    | 5179(4)   | 229(1)  | 3400(1) | 8(1)            | 5.02 |
| V(2)  | 4a    | 4655(4)   | 1722(1) | 8538(1) | 7(1)            | 4.93 |
| V(3)  | 4a    | 9466(3)   | 861(1)  | 5888(1) | 7(1)            | 4.88 |
| F(1)  | 4a    | 10154(18) | 5094(5) | 7486(3) | 18(2)           | 0.86 |
| O(1)  | 4a    | 3729(14)  | -975(6) | 3613(4) | 6(2)            | 1.90 |
| O(2)  | 4a    | 6309(15)  | 632(7)  | 4256(4) | 12(2)           | 2.07 |
| O(3)  | 4a    | 2636(14)  | 3524(6) | 6915(4) | 5(2)            | 1.94 |
| O(4)  | 4a    | 7788(15)  | 3907(7) | 6625(4) | 13(2)           | 1.86 |
| O(5)  | 4a    | 3735(14)  | 5540(6) | 6659(4) | 8(2)            | 1.96 |
| O(6)  | 4a    | 3859(14)  | 1729(6) | 7534(4) | 8(2)            | 2.08 |
| O(7)  | 4a    | 7349(13)  | 2757(6) | 8281(4) | 5(2)            | 1.89 |
| O(8)  | 4a    | 5114(19)  | 1857(6) | 9289(3) | 19(2)           | 1.68 |
| O(9)  | 4a    | 2240(14)  | 3180(6) | 8424(4) | 8(2)            | 1.92 |
| O(10) | 4a    | 7147(14)  | 1008(6) | 6395(4) | 9(2)            | 1.86 |
| O(11) | 4a    | 8980(15)  | 1938(6) | 5387(4) | 12(2)           | 2.04 |
| O(12) | 4a    | 1961(14)  | 1613(6) | 6423(4) | 9(2)            | 2.23 |
| O(13) | 4a    | 7871(15)  | -227(7) | 5344(4) | 14(2)           | 2.01 |
| O(14) | 4a    | 8624(15)  | 4529(6) | 8818(4) | 13(2)           | 1.98 |
| O(15) | 4a    | 3471(15)  | 931(7)  | 5245(4) | 14(2)           | 1.70 |

**Table S2** Anisotropic displacement parameters ( $\text{\AA}^2 \times 10^3$ ) for PVOFS.

| Atoms | U11   | U22   | U33   | U23   | U13   | U12    |
|-------|-------|-------|-------|-------|-------|--------|
| Pb(1) | 13(1) | 16(1) | 12(1) | 2(1)  | 0(1)  | 2(1)   |
| Pb(2) | 16(1) | 14(1) | 14(1) | 1(1)  | 1(1)  | 0(1)   |
| Se(1) | 13(1) | 8(1)  | 5(1)  | 0(1)  | -1(1) | -2(1)  |
| Se(2) | 7(1)  | 5(1)  | 5(1)  | 0(1)  | 0(1)  | 0(1)   |
| Se(3) | 5(1)  | 5(1)  | 7(1)  | 0(1)  | 1(1)  | -1(1)  |
| V(1)  | 7(1)  | 7(1)  | 11(1) | 2(1)  | 0(1)  | -2(1)  |
| V(2)  | 7(1)  | 5(1)  | 7(1)  | 1(1)  | -1(1) | -2(1)  |
| V(3)  | 12(1) | 4(1)  | 4(1)  | -1(1) | -2(1) | 1(1)   |
| F(1)  | 27(4) | 19(3) | 9(3)  | -7(3) | -1(4) | 7(4)   |
| O(1)  | 6(2)  | 6(2)  | 6(2)  | 0(1)  | 0(1)  | -1(1)  |
| O(2)  | 16(4) | 17(4) | 4(4)  | 4(4)  | -4(4) | -13(4) |
| O(3)  | 5(2)  | 5(2)  | 6(2)  | 1(1)  | 1(1)  | 0(1)   |
| O(4)  | 7(4)  | 11(4) | 21(5) | 6(4)  | -2(4) | -5(3)  |
| O(5)  | 4(4)  | 8(4)  | 13(4) | 0(3)  | -1(3) | -1(3)  |
| O(6)  | 7(2)  | 8(2)  | 7(2)  | 0(1)  | 0(1)  | 1(1)   |
| O(7)  | 4(2)  | 5(2)  | 4(2)  | 0(1)  | 0(1)  | 0(1)   |
| O(8)  | 26(4) | 20(4) | 11(4) | -3(3) | -3(5) | -7(5)  |
| O(9)  | 8(4)  | 4(4)  | 11(5) | -1(4) | 2(3)  | -1(3)  |
| O(10) | 9(2)  | 9(2)  | 9(2)  | -1(1) | 0(1)  | 0(1)   |
| O(11) | 15(4) | 11(4) | 10(4) | -1(3) | -1(3) | 6(4)   |
| O(12) | 8(2)  | 9(2)  | 8(2)  | -1(1) | 0(1)  | 0(1)   |
| O(13) | 14(2) | 13(2) | 14(2) | 0(1)  | -1(1) | 0(1)   |
| O(14) | 13(2) | 13(2) | 13(2) | 0(1)  | -1(1) | -1(1)  |
| O(15) | 12(4) | 12(4) | 17(5) | -5(4) | 3(4)  | 2(4)   |

**Table S3** Selected bond lengths (Å) for PVOFS.<sup>a</sup>

|               |          |              |          |
|---------------|----------|--------------|----------|
| Pb(1)-O(11)#1 | 2.475(8) | Se(3)-O(9)   | 1.697(8) |
| Pb(1)-O(11)   | 2.517(8) | Se(3)-O(7)#3 | 1.729(8) |
| Pb(1)-O(12)   | 2.540(8) | V(1)-O(4)#1  | 1.635(8) |
| Pb(1)-O(15)   | 2.622(8) | V(1)-O(1)    | 1.702(8) |
| Pb(1)-O(2)#1  | 2.662(8) | V(1)-F(1)#1  | 1.909(6) |
| Pb(1)-O(4)    | 2.728(9) | V(1)-O(2)    | 1.963(8) |
| Pb(2)-O(10)#2 | 2.601(8) | V(1)-O(5)#4  | 2.090(8) |
| Pb(2)-O(6)#2  | 2.609(7) | V(1)-O(3)#4  | 2.093(8) |
| Pb(2)-O(3)    | 2.648(8) | V(2)-O(8)    | 1.611(7) |
| Pb(2)-O(5)    | 2.677(8) | V(2)-O(5)#5  | 1.712(8) |
| Pb(2)-F(1)#3  | 2.682(9) | V(2)-O(7)    | 1.965(8) |
| Pb(2)-O(9)    | 2.707(8) | V(2)-O(1)#6  | 2.001(8) |
| Se(1)-O(15)   | 1.673(8) | V(2)-O(6)    | 2.158(8) |
| Se(1)-O(13)   | 1.711(8) | V(2)-O(9)    | 2.184(8) |
| Se(1)-O(2)    | 1.744(8) | V(3)-O(10)   | 1.631(8) |
| Se(2)-O(6)    | 1.676(7) | V(3)-O(11)   | 1.696(8) |
| Se(2)-O(12)   | 1.724(8) | V(3)-O(13)   | 1.935(9) |
| Se(2)-O(3)    | 1.729(8) | V(3)-O(12)#7 | 1.955(8) |
| Se(3)-O(14)#3 | 1.690(8) | V(3)-O(14)#8 | 1.996(8) |

<sup>a</sup> Symmetry codes: #1  $x-1/2, -y+1/2, -z+1$ ; #2  $-x+1, y+1/2, -z+3/2$ ; #3  $x-1, y, z$ ; #4  $x+1/2, -y+1/2, -z+1$ ; #5  $-x+1, y-1/2, -z+3/2$ ; #6  $-x+1/2, -y, z+1/2$ ; #7  $x+1, y, z$ ; #8  $-x+2, y-1/2, -z+3/2$ .

**Table S4** The reaction parameters of contrast experiments.

| Temperature (°C) |    | 180   |     |     |     | 210 |       |     |     | 230 |       |     |       |
|------------------|----|-------|-----|-----|-----|-----|-------|-----|-----|-----|-------|-----|-------|
| element (mmol)   | Pb | 1.0   | 1.0 | 1.0 | 1.0 | 1.0 | 1.0   | 1.0 | 1.0 | 1.0 | 1.0   | 1.0 | 1.0   |
|                  | V  | 1.6   | 1.6 | 1.6 | 1.6 | 1.6 | 1.6   | 1.6 | 1.6 | 1.6 | 1.6   | 1.6 | 1.6   |
|                  | Se | 2.0   | 2.5 | 4.5 | 5.0 | 2.0 | 2.5   | 4.5 | 5.0 | 2.0 | 2.5   | 4.5 | 5.0   |
| Products         |    | C/D/E | C/D | B/C | B/C | B/E | A/B/E | A/B | A/C | B/E | A/B/E | A/B | A/C/E |

A: PVOFS; B:  $\text{PbVO}_2(\text{SeO}_3)\text{F}$ ; <sup>S1</sup> C:  $\text{PbSeO}_3$  (ICSD #98376); D:  $\text{PbF}_2$  (ICSD #161393); E: amorphous.

#### Reference

[S1] X. L. Cao, F. Kong, C. L. Hu, X. Xu and J. G. Mao, *Inorg. Chem.*, 2014, **53**, 8816-8824.

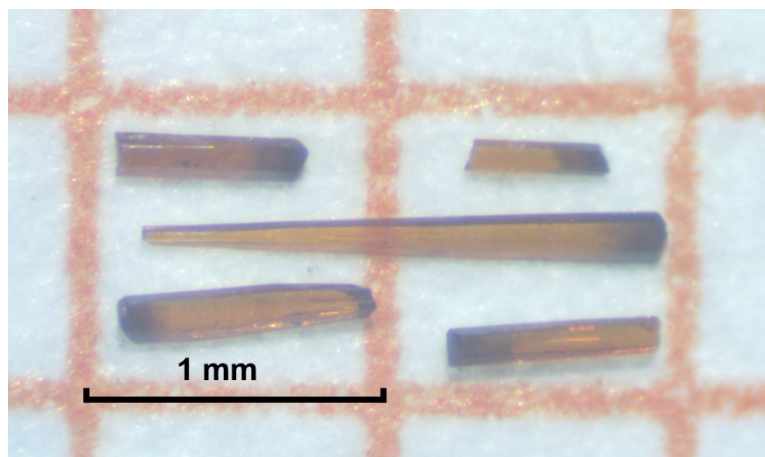

**Fig. S1** Photograph of crystals of PVOFS.

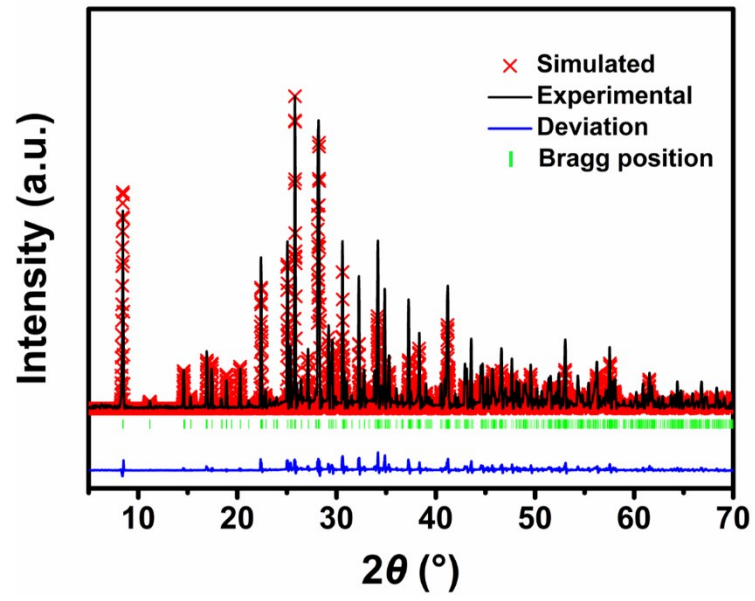

**Fig. S2** Experimental and simulated powder X-ray diffraction patterns of PVOFS.



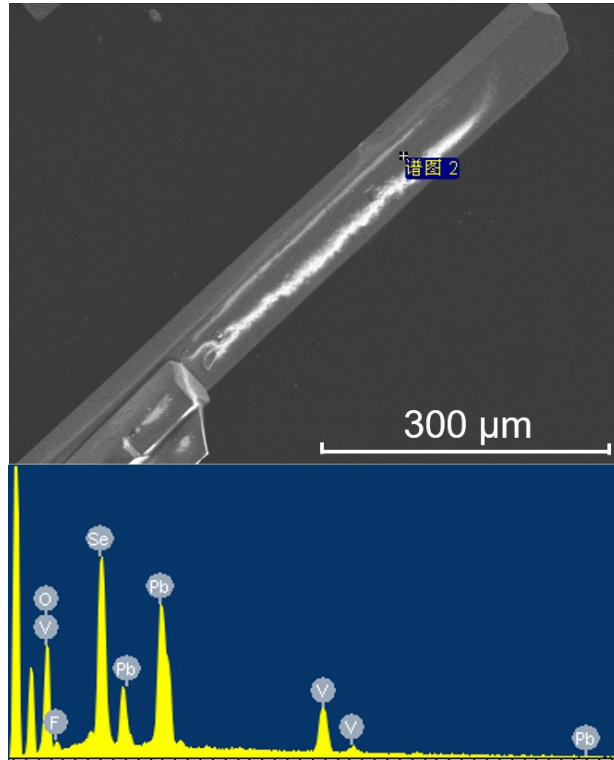

**Fig. S3** The energy dispersive spectroscopy analysis of PVOFS.

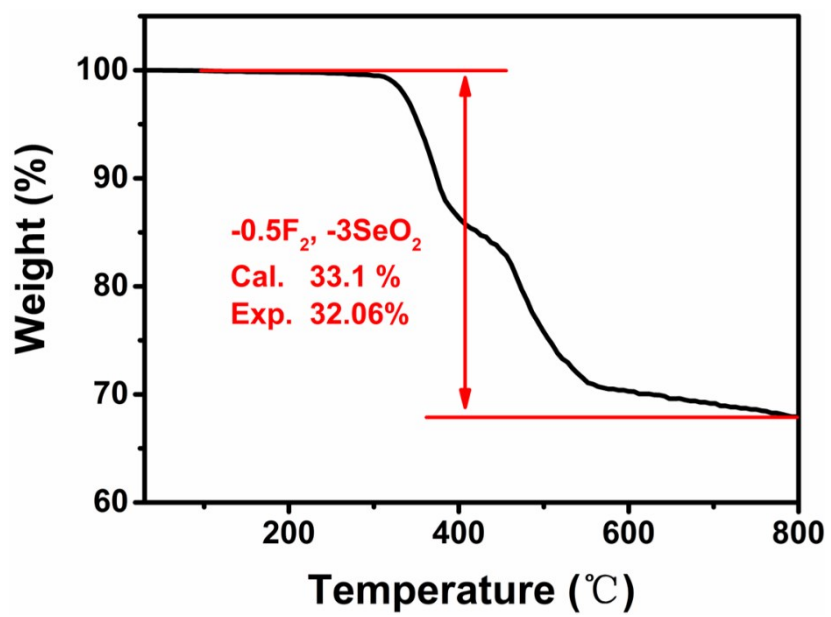

Fig. S4 Thermogravimetric analysis of PVOFS under a nitrogen atmosphere.

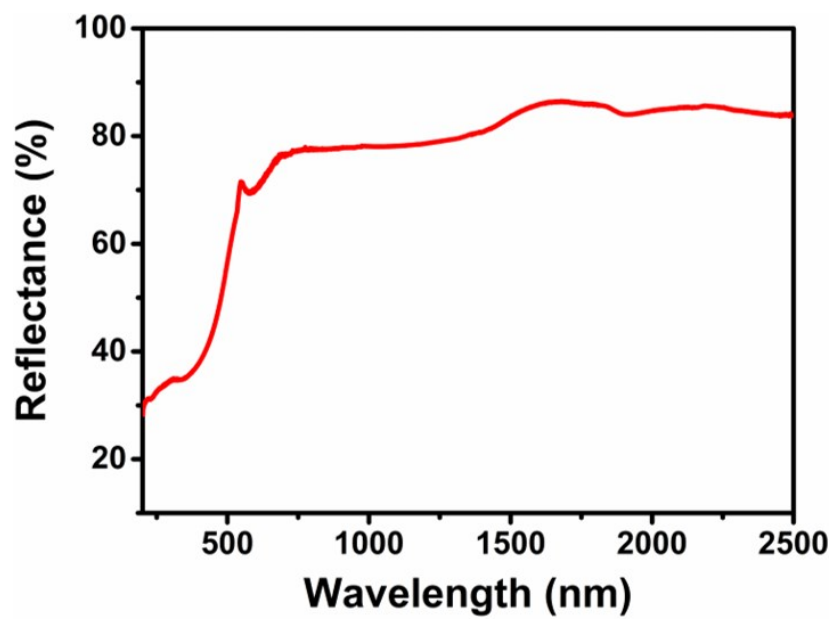

Fig. S5 UV-Vis-NIR diffuse reflectance spectrum of PVOFS.

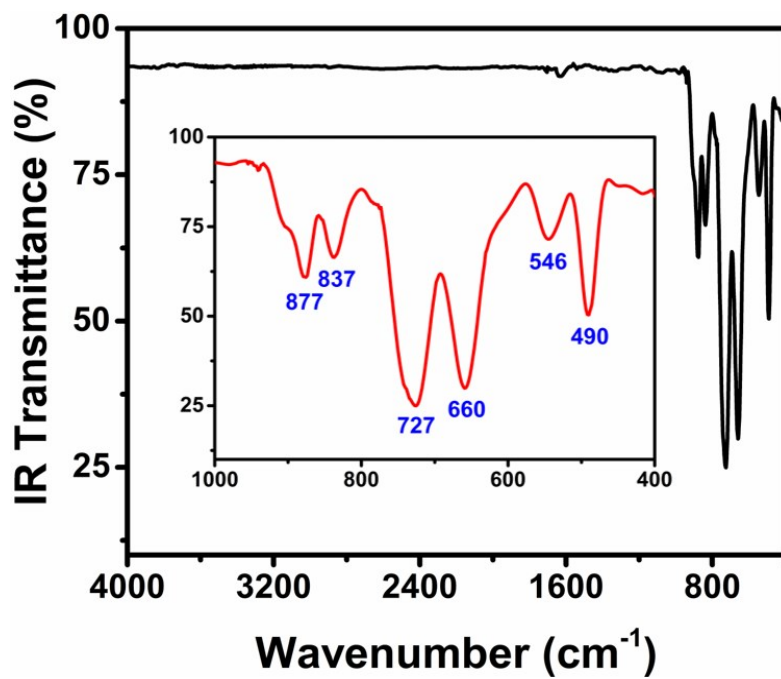

Fig. S6 IR transmittance spectrum of PVOFS.
